# Supplementary material
Source: publisher figshare collection journal article supplement (https://springernature.figshare.com/ndownloader/files/35902352)
Supplement: Supplementary file 1 [file 35902352]

index,gender,date,age,weight,height,date2,age2,weight2,height2
001,f,2011-06-20,21,58,160
002,f,2012-05-15,22,58.9,179.3,2012-06-05,22,58.3,178.8
003,m,2013-06-15,21,78.8,182.6
004,m,2018-05-30,22,73.7,181.7
005,f,2015-06-11,22,69,170.8
006,f,2013-12-10,22,81.1,180.7
007,m,2019-01-21,20,83.9,179.5
008,f,2011-12-12,22,63.7,161.6
009,f,2013-05-31,23,48,158.8,2014-05-20,24,48.7,158.8
010,f,2013-12-11,21,48.7,159.3
011,f,2013-01-07,21,66.1,169.6
012,f,2013-01-11,22,76,173
013,m,2017-11-21,22,70,174.7
014,m,2018-06-20,23,86.4,189.6
015,m,2012-05-15,23,71.4,183.3,2012-05-25,23,71.7,182.7
016,f,2011-12-16,24,53.2,163.4
017,f,2013-01-15,22,62.3,165.1
018,f,2015-06-12,22,57.6,161.9
019,m,2011-11-26,27,68.1,172.3
020,f,2017-12-15,22,83.5,169.5
021,m,2017-12-05,22,81.4,183
022,f,2015-06-12,22,56,169.2
023,f,2013-05-24,21,52.5,151.6,2014-05-20,22,53.6,151.7
024,m,2013-05-22,21,84.8,187.9
025,f,2017-12-13,22,57.3,159.6
026,f,2015-06-08,22,48.2,160.6
027,f,2013-12-18,24,64.4,167.1
028,m,2018-06-13,23,105.5,179.3
029,m,2018-11-19,21,69.5,183
030,f,2013-05-28,21,55.9,165.2,2014-03-21,22,58.5,166
031,f,2018-05-16,22,77.9,178.7
032,m,2013-06-14,20.5,62.9,183.7
033,m,2012-05-08,21,80.2,182.2
034,m,2012-04-03,20,86.5,170.9
035,m,2012-05-08,21,66.3,172.4,2012-05-25,21,66.5,172.3
036,m,2017-12-05,22,68,173.4
037,m,2013-06-04,21,82.8,173.6
038,m,2014-05-20,22,90.1,188.2
039,m,2019-01-02,21,72.6,174.2
040,m,2017-12-08,22,103.8,182.3
041,m,2018-11-19,20,137.5,171
042,m,2018-12-17,21,80.9,183.1
043,f,2013-01-08,21,60.6,170.8
044,m,2018-05-30,24,93.3,191.2
045,f,2011-12-12,21,70.8,163.5
046,m,2015-06-08,23,59.1,180.6
047,m,2019-01-08,21,75.9,183.5
048,m,2018-06-13,24,92.9,184.8
049,m,2011-12-16,22,73.3,186.8
050,m,2013-06-07,22,71.3,164.8
051,m,2017-12-04,22,78.7,183.4
052,f,2012-12-11,21,56.8,174.1
053,f,2011-06-10,20,51.4,170.1
054,f,2013-12-11,24,64.3,158
055,f,2013-05-24,20,81.4,167.2,2014-03-21,21,83.6,166.8
056,m,2013-01-14,21,84.8,183.7
057,m,2019-01-02,21,105.2,183.5
058,m,2013-06-05,22,74,192.9
059,m,2011-06-14,20,80.7,178
060,f,2018-12-03,20,67.3,174
061,f,2011-12-05,21,53.8,155.6
062,f,2013-05-31,22,48.3,161.3
063,f,2015-06-12,22,65.3,173
064,f,2019-01-29,25,55.5,163.5
065,m,2019-01-08,20,85.3,180.5
066,m,2011-06-14,20,69.3,185.5
067,f,2015-06-12,22,75.5,170.6
068,m,2011-06-08,20,68.3,183.1
069,m,2013-06-07,21,90.6,184.1
070,m,2013-12-11,23,85.1,185.3
071,f,2013-01-10,21,55.4,161.4
072,f,2017-12-12,22,63.7,163.3
073,m,2011-06-14,20,100.7,186
074,m,2013-06-05,22,71.4,174.9
075,f,2017-12-28,24,66.5,166.5
076,f,2012-05-22,21,62.7,161
077,f,2017-12-15,22,67.8,163.3
078,m,2012-03-20,21,86.8,185.3
079,m,2012-06-08,21,90.7,187.4
080,m,2013-05-31,21,63,181.9
081,f,2011-12-05,26,51.8,170.6
082,m,2019-01-08,20,75.1,175.5
083,m,2013-01-09,21,71.2,180.8
084,m,2013-05-21,21,92.8,178,2014-05-21,22,92.5,178.3
085,m,2011-06-14,23,90.3,183.3
086,f,2017-12-05,22,71.9,170.3
087,f,2013-01-11,21,65.8,166.1
088,m,2011-06-11,21,83.2,190.9
089,f,2011-06-08,19,59,171.1
090,f,2017-12-05,22,60.3,163.2
091,f,2015-06-17,21,67.2,167.7
092,m,2013-05-22,23,72.6,180.6,2014-05-20,24,71.4,180.1
093,m,2011-12-13,21,82.6,176.1
094,f,2011-06-09,20,77.8,174
095,m,2015-06-11,22,83.2,179.2
096,m,2012-04-03,23,77.5,184.2
097,m,2012-03-20,21,101.3,182.1
098,f,2011-12-13,22,73.9,156.3
099,f,2012-03-20,21,60.2,161.9,2012-05-18,21,59.8,162.8
100,m,2013-05-31,22,87.5,187.8,2014-05-21,23,92.6,188.4
101,m,2011-06-10,20,82.1,175.6
102,f,2011-06-10,21,52.9,152
103,m,2018-12-17,21,76.7,181
104,m,2013-05-29,21,105.3,181.2,2014-06-20,22,108,181.6
105,m,2017-11-08,22,93.2,186
106,f,2013-05-29,20,56,165.5,2014-05-21,21,56.6,165.2
107,m,2011-06-21,21,82.2,177.9
108,m,2014-05-21,22.,63.2,164.7
109,m,2013-05-21,22,76.4,195.3
110,f,2013-01-09,22,51.5,165
111,f,2015-06-11,23,50.1,158.9
112,f,2013-05-21,21,49.9,162.5
113,f,2013-05-22,21,81.6,159.9
114,m,2013-06-07,21,94.3,185.6
115,f,2015-06-12,23,60.5,168.2
116,m,2017-11-22,22,115,192.6
117,f,2017-12-15,22,47.7,164.9
118,m,2016-05-23,21,87.9,174.6
119,f,2013-06-19,24,77.1,161.2
120,f,2014-01-08,22,51.1,163.7
121,m,2012-06-05,20,61.7,163.8
122,m,2013-06-20,22,87.4,195.7
123,m,2013-05-31,22,70.3,173.8
124,m,2011-06-07,21,53.6,166.4
125,f,2011-06-20,21,52.3,166.6
126,m,2017-12-15,23,88.1,198
127,m,2011-06-07,22,75.7,182.9
128,m,2019-01-08,21,76.2,187.5
129,f,2013-01-22,21,59.5,160.9
130,f,2013-12-18,21,50,161.4
131,m,2013-06-19,24,90.5,171.8
132,m,2012-05-08,21,93,181.4
133,m,2012-05-18,22,135,186
134,f,2012-03-20,20,57.5,168.9,2012-05-08,20,57.7,169.1
135,m,2011-06-07,21,74,183
136,f,2011-12-12,21,77.3,167.9
137,f,2015-06-17,24,86.5,172.3
138,f,2011-06-18,20,56.7,163.5
139,f,2012-05-08,20,74.2,171.4,2012-05-22,20,73.5,171.3
140,m,2011-06-07,22,109.9,195.7
141,m,2011-05-18,22,84.8,184.2,2012-06-09,23,87.5,183.9
142,f,2011-05-11,21,68.7,167.7,2012-05-29,22,67.8,168.1
143,f,2011-12-16,21,65.4,174
144,m,2012-05-15,22,117,193.1
145,f,2014-01-08,22,47.1,166.6
146,f,2017-12-17,22,54.5,169.7
147,m,2019-01-21,21,83,182.5
148,m,2012-03-22,21,74.1,172.2,2012-06-15,21,73.5,172.5
149,m,2011-06-07,21,72.9,176.3
150,m,2013-05-22,22,80.1,178.2
151,m,2012-05-25,21,139.8,179.7
152,f,2011-12-13,21,51.7,162.2
153,m,2011-06-17,20,83.5,177.8
154,m,2011-12-13,21,77.4,186
155,f,2016-05-20,22,68.1,177.3
156,m,2013-01-15,22,82.5,171.4
157,m,2012-06-15,22,59.8,170.7,2012-06-22,22,58.6,171
158,m,1014-01-16,21,67.3,172.4
159,f,2018-05-16,23,77.2,165.7
160,m,2012-05-18,23,94.5,172.8
161,m,2015-06-17,24,75.8,175.2
162,m,2013-06-20,21,76.6,185.2
163,m,2013-05-22,22,91.3,183.5
164,f,2017-12-15,22,54,168.1
165,m,2012-05-18,20,104,179
166,m,2012-05-11,22,92.7,183.8,2012-05-29,22,92.8,182.7
167,m,2017-12-28,23,86,187.3
168,f,2015-06-12,22,65.8,160
169,f,2015-06-11,22,62.9,163.5
170,f,2011-06-10,22,56.6,166.3
171,m,2019-01-21,20,81.5,183.5
172,f,2018-06-11,23,54.7,164.9
173,m,2018-05-30,23,101.8,175.1
174,m,2011-06-20,21,90.3,169.9
175,m,2012-03-20,20,87.4,187.3,2012-06-19,20,84.8,186.9
176,m,2013-05-21,22,76.7,174.7
177,m,2018-12-17,21,81,178.8
178,f,2013-01-14,21,71.4,175.5
179,f,2014-01-08,21,59.9,172.6
180,f,2013-01-08,21,64.2,166.2
181,f,2011-06-24,21,62.1,166.5
182,m,2013-03-27,20,71.2,182.7,2014-05-20,21,68.4,181.8
183,m,2013-06-05,22,74.7,174.4
184,m,2011-06-21,21,90.6,181
185,f,2011-12-13,21,59.2,171.9
186,m,2018-05-16,23,95.5,180.5
187,f,2015-06-11,22,75.3,174.6
188,f,2011-12-05,21,60,167.1
189,f,2011-12-13,21,64.3,174.4
190,m,2013-03-27,23,87.1,183.1
191,m,2017-12-15,22,71.8,174.7
192,f,2013-12-18,21,65.6,175.9
193,f,2011-06-11,20,66.5,165.8
194,m,2013-03-27,22,66.1,180.2
195,f,2013-01-22,21,68.7,168.6
196,m,2013-05-22,22,74.7,179.7
197,m,2018-05-30,23,77.3,187.4
198,f,2012-05-11,22,55.3,170.7
199,m,2011-06-20,21,63.5,175
200,f,2011-12-09,21,55.5,165.5
201,f,2012-05-11,21,65.9,166.1,2012-05-29,21,66.8,165.2
202,m,2016-06-06,21,68.9,187.4
203,m,2012-05-11,21,83.7,180.4,2012-05-29,21,81.4,180.3
204,m,2013-05-24,21,73.4,175.5
205,m,2019-01-08,20,88.5,200
206,f,2014-01-08,22,72.9,160.9
207,f,2011-06-11,20,62.3,163
208,m,2012-05-04,20,88.8,183.2
209,m,2012-05-18,22,89.6,180.1
210,m,2018-05-16,24,121.8,181.3
211,f,2017-12-28,23,67.8,175.3
212,f,2011-12-09,21,121,171.5
213,m,2015-06-11,21,90.9,196.4
214,f,2011-06-11,19,54.2,159.7
215,m,2013-03-22,22,81.1,178.8,2014-05-21,23,85.1,178.9
216,m,2012-04-03,21,94.4,179.9,2012-06-05,21,97.9,179.7
217,m,2011-06-20,22,73.8,190.1
218,m,2018-11-19,21,94,183
219,m,2013-05-31,21,78.2,181.9
220,m,2011-06-20,21,86.9,178.3
221,f,2013-01-09,21,57.4,157.1
222,f,2012-04-03,21,62.9,174.2
223,m,2012-06-15,23,55.6,164.6
224,m,2013-01-11,21,74.8,172.5
225,f,2012-02-02,21,86.2,168.8
226,f,2015-06-17,22,76.1,171.5
227,f,2011-06-21,20,61.1,169.4
228,f,2017-12-05,22,47.6,166.7
229,m,2012-05-08,22,77.3,173.6,2012-06-05,22,76.2,173.8
230,m,2013-06-21,22,86.5,181.1
231,m,2012-02-02,21,77.2,181.1
232,m,2011-06-03,20,98.9,190.4
233,m,2019-01-08,21,92.6,184.5
234,m,2011-06-17,20,80.6,179.4
235,f,2011-06-10,20,54.8,163.6
236,m,2013-01-09,21,83.6,181.2
237,m,2013-06-15,24,83.6,181.2
238,m,2016-06-06,21,97.1,190
239,m,2013-06-07,21,106.3,186.7
240,m,2011-06-03,21,123.7,179
241,m,2012-05-04,22,94.2,182.3
242,f,2012-02-02,21,71.8,163.3
243,f,2016-05-25,22,52.3,165.8
244,f,2013-01-24,25,63.6,168.8
245,f,2012-05-29,21,79.4,169.7
246,f,2018-05-20,22,58.9,165.7
247,f,2015-06-12,22,68.5,172.5
248,f,2013-12-18,21,57.9,164.7
249,m,2011-06-03,20,63.3,181
250,f,2011-06-21,24,60.9,166.1
251,m,2011-06-03,21,80.7,181.2
252,m,2018-11-19,20,70,165
253,m,2018-12-17,20,80.8,176.2
254,f,2013-01-15,21,65.8,165.6
255,m,2012-05-11,22,100,182.2
256,m,2011-06-03,20,82,181.6
257,m,2011-06-14,21,72.9,175.8
258,m,2011-06-14,21,88.5,186.5
259,m,2011-06-21,25,72.8,173.9
260,m,2018-12-03,21,61.7,174
261,f,2011-06-08,19,67.3,172.7
262,m,2011-06-03,21,62.2,180
263,m,2011-06-08,20,80,175.8
264,m,2011-06-24,20,68.5,183
265,m,2011-06-03,20,69.15,186.3
266,f,2012-10-12,22,54,168.4
267,m,2013-05-29,22,74.7,172.6
268,m,2011-06-03,19,95.5,194.4
269,m,2018-06-06,22,83.4,181.9
270,f,2015-06-15,24,54,161.2
271,f,2013-01-24,21,61.9,167
272,m,2011-06-17,22,83.2,178.4
273,m,2011-06-03,19,91.5,183.4
274,m,2011-06-17,21,69.5,185.3
275,m,2011-06-03,20,64.4,178.3
276,m,2013-05-21,21,71.8,172.8,2014-05-19,22,75.2,172.8
277,m,2012-06-11,22,102.9,204
278,f,2013-12-18,21,61.8,158.3
279,f,2011-12-14,21,82.3,160.5
280,m,2013-03-29,21,61.8,173.8,2014-05-21,22,60.3,173.3
281,f,2011-06-21,22,92.5,169.9
282,f,2017-12-13,21,53.6,165.2
283,m,2013-05-29,22,86.5,182.1
284,f,2012-05-04,22,52.9,159,2012-06-12,22,51.9,159
285,f,2012-06-12,23,73.4,163.4
286,f,2017-12-13,21,50,164.2
287,m,2016-06-06,24,100.9,198
288,f,2013-05-29,21,58.8,169.3
289,m,2012-04-03,22,71.5,175.3
290,f,2014-01-08,21,61.3,165.7
291,f,2017-12-04,22,64.4,166.5
292,m,2013-05-24,20,58.6,176
293,f,2013-12-10,21,66.77,164.4
294,m,2013-03-27,22,99.3,188.3
295,m,2019-01-02,20,90.1,182.5
296,f,2015-06-15,22,67.2,170.7
297,f,2015-06-15,23,50.8,170.9
298,f,2018-05-16,23,72,180
299,f,2017-12-04,21,58,176.1
300,m,2011-06-20,22,104,182.1
301,m,2011-06-17,22,67.9,182.6
302,f,2017-12-05,22,57.3,169.5
303,f,2018-01-09,23,59.8,169.5
304,f,2012-01-12,21,64.4,171.1
305,f,2013-01-16,21,64.5,178.7
306,f,2013-01-15,21,48.8,164.6
307,f,2017-12-13,22,62.4,164.6
308,m,2013-06-05,22,70.3,177.9
309,m,2019-01-02,21,109.5,185.5
310,m,2018-06-06,23,99.5,179.3
311,m,2012-06-08,21,81.4,175.1
312,m,2013-06-05,21,96.5,190.6
313,f,2017-12-28,23,49.6,161
314,m,2011-12-09,21,72.4,171.2
315,f,2011-06-10,20,68.6,172
316,m,2015-06-17,21,79,194.2
317,m,2018-05-30,24,86.6,192.2
318,m,2011-06-18,21,104.1,180
319,m,2013-06-07,22,93.7,177.6
320,f,2017-12-04,22,64.3,180.8
321,f,2017-12-13,21,60.6,174.9
322,m,2011-06-21,21,85.7,182.8
323,m,2012-05-22,22,73.9,180.8
324,m,2013-12-11,24,107,180.7
